# Supplementary material
Source: PubMed Central journal article supplement (PMC165456)
Supplement: nar_31_1_432__1.pdf [file nar_31_1_432__1.pdf]

### Box H/ACA snoRNAs with unknown RNA targets

| Name    | Site | Gene No, | Cluster | P site | Comments | Plant orthologues | Expression |
|---------|------|----------|---------|--------|----------|-------------------|------------|
|         |      |          |         |        |          |                   |            |
| SnoR109 |      |          |         |        |          |                   | cDNA       |
| SnoR110 |      |          |         |        |          |                   | N, cDNA    |
| SnoR111 |      |          |         |        |          |                   | N, cDNA    |
| SnoR112 |      |          |         |        |          |                   | N, cDNA    |

### Box H/ACA snoRNAs with complementarity to snRNAs

| Name    | Site             | Gene No, | Cluster | P site               | Comments | Plant orthologues | Expression |
|---------|------------------|----------|---------|----------------------|----------|-------------------|------------|
|         |                  |          |         |                      |          |                   |            |
| SnoR103 | U5 Ψ50<br>U5 Ψ47 |          |         | P1 U5 50<br>P2 U5 47 |          |                   | N, cDNA    |
| SnoR104 | U2 Ψ42           |          |         | P1 U2 42             |          |                   | N, cDNA    |

| Name   | Site                   | Gene No, | Cluster | P site                     | Comments                                                                           | Plant orthologues | Expression |
|--------|------------------------|----------|---------|----------------------------|------------------------------------------------------------------------------------|-------------------|------------|
| U65    | 25S Ψ2816<br>25S Ψ2870 | 3        | √       | P1 25S 2816<br>P2 25S 2870 | Hu 4373 (P1 U65); Yeast 2823 (P1 snR34)<br>Hu 4427 (P2 U65); Yeast 2877 (P2 snR34) | √                 |            |
| SnoR5  | 18S Ψ1000<br>18S Ψ1118 | 2        | √       | P1 18S 1000<br>P2 18S 1118 | Yeast 998 (P1 snR31)                                                               | √                 | cDNA       |
| SnoR72 | 18S Ψ1000<br>18S Ψ1118 |          |         | P1 18S 1000<br>P2 18S 1118 | Same P sites as sonR5 but different gene sequence                                  |                   | N, cDNA    |
| SnoR73 | 18S Ψ634<br>18S Ψ1520  |          |         | P1 18S 634<br>P2 18S 1520  | Hu 18S 681<br>-                                                                    |                   | N,<br>cDNA |
| SnoR74 | 25S Ψ2913              |          |         | P2 25S 2913                | Hu 4470; Yeast 2920                                                                |                   | N,<br>cDNA |
| SnoR75 | 25S Ψ2913              |          |         | P2 25S 2913                | Hu 4470; Yeast 2920. Same P site as snoR74 but different gene sequence             |                   | N,<br>cDNA |
| SnoR76 | 18S Ψ918<br>25S Ψ214   |          |         | P2 18S 918<br>25S 214      |                                                                                    |                   | N, cDNA    |
| SnoR77 | 25S Ψ826<br>18S Ψ752   |          |         | P1 25S 826<br>P2 18S 752   | Hu 1523                                                                            |                   | N,<br>cDNA |
| SnoR78 | 25S Ψ2620<br>18S Ψ1523 |          |         | P1 25S 2620<br>P2 18S 1523 |                                                                                    |                   | N,<br>cDNA |
| SnoR79 | 25S Ψ2248              |          |         | P1 25S 2248                | Hu 3741                                                                            |                   | N, cDNA    |
| SnoR80 | 25S Ψ1130<br>25S Ψ 999 |          |         | P1 25S 1130<br>P2 25S 999  | Hu 1909; Yeast 1124 (P1 snR5)<br>Hu 1717; Yeast 990 (P1 snR49)                     |                   | N,<br>cDNA |
| SnoR81 | 25S Ψ1013              |          |         | P2 25S 1013                | Hu 1731; Yeast 1004 (P2 snR5)<br>Same target as snoR98 but different gene.         |                   | N,<br>cDNA |
| SnoR82 | 25S Ψ783               |          |         | P2 25S 783                 |                                                                                    |                   | N,<br>cDNA |
| SnoR83 | 25S Ψ2304<br>25S Ψ2339 |          |         | P1 25S 2304<br>P2 25S 2339 | Hu 25S 3797 (a mΨ)<br>Hu 25S 3832                                                  |                   | N,<br>cDNA |
| SnoR84 | 18S Ψ827               |          |         | P2 18S 827                 |                                                                                    |                   | N,<br>cDNA |
| SnoR85 | 5.8S Ψ78               |          |         | P2 5.8S 78                 |                                                                                    |                   | N,<br>cDNA |

|                |                                                                     |  |  |                                      |                                                                                |  |            |
|----------------|---------------------------------------------------------------------|--|--|--------------------------------------|--------------------------------------------------------------------------------|--|------------|
| <b>SnoR86</b>  | <b>25S Ψ2555</b><br><b>18S Ψ360</b>                                 |  |  | P1 25S 2555<br>P2 18S 360            | Note: 25S 2555 is not a U in <i>Sinapsis</i> (mustard).                        |  | N,<br>cDNA |
| <b>SnoR87</b>  | <b>18S Ψ715</b><br><b>25S Ψ2126</b>                                 |  |  | P1 18S 715<br>P1 25S 2126            | Hu 25S 3618                                                                    |  | N,<br>cDNA |
| <b>SnoR88</b>  | <b>18S Ψ1302</b>                                                    |  |  | P1 18S 1302                          |                                                                                |  | N,<br>cDNA |
| <b>U19</b>     | <b>25S Ψ2250</b>                                                    |  |  | P1 25S 2250                          | P2 25S 3743                                                                    |  | N,<br>cDNA |
| <b>SnoR89</b>  | <b>18S Ψ220</b><br><b>25S Ψ35</b>                                   |  |  | P1 18S 220<br>P2 25S 35              |                                                                                |  | N,<br>cDNA |
| <b>SnoR90</b>  | <b>18S Ψ948</b>                                                     |  |  | P1 18S 948                           | Hu 18S 1004                                                                    |  | N,<br>cDNA |
| <b>SnoR91</b>  | <b>18S Ψ 604</b><br><b>18S Ψ 761</b><br><b>18S Ψ</b><br><b>1090</b> |  |  | P1 18S 604<br>P2 18S 761<br>18S 1090 | Hu 18S 815                                                                     |  | N,<br>cDNA |
| <b>SnoR92</b>  | <b>25S Ψ2244</b>                                                    |  |  | P1 25S 2244                          | Hu 3737                                                                        |  | N,<br>cDNA |
| <b>SnoR93</b>  | <b>25S Ψ2773</b>                                                    |  |  | P2 25S 2773                          | Hu 25S 4330                                                                    |  | cDNA       |
| <b>SnoR94</b>  | <b>25S Ψ132</b>                                                     |  |  | P2 25S 132                           |                                                                                |  | N,<br>cDNA |
| <b>SnoR95</b>  | <b>25S Ψ2703</b>                                                    |  |  | P1 25S 2703                          |                                                                                |  | N,<br>cDNA |
| <b>SnoR96</b>  | <b>25S Ψ1246</b>                                                    |  |  | P1 25S 1246                          |                                                                                |  | N,<br>cDNA |
| <b>SnoR97</b>  | <b>25S Ψ2707</b>                                                    |  |  | P2 25S 2707                          | Hu 25S 4263                                                                    |  | N,<br>cDNA |
| <b>SnoR98</b>  | <b>25S Ψ1013</b>                                                    |  |  | P2 25S 1013                          | Hu 25S 1731; Yeast 1004 (P2 snR5)<br>Same target as snoR81 but different gene. |  | N,<br>cDNA |
| <b>SnoR99</b>  | <b>18S Ψ803</b><br><b>25S Ψ2201</b>                                 |  |  | P1 18S 803<br>P2 25S 2201            |                                                                                |  | N, cDNA    |
| <b>SnoR100</b> | <b>18S Ψ111</b>                                                     |  |  | P2 18S 111                           | Hu 18S 110                                                                     |  | N, cDNA    |
