# Supplementary material
Source: PubMed Central journal article supplement (PMC165456)
Supplement: nar_31_1_432__2.pdf [file nar_31_1_432__2.pdf]

### Box C/D snoRNAs with unknown RNA targets

| Name    | Site    | Gene No. | Cluster | D/D' box and complementarity | Plant orthologues | Expression |
|---------|---------|----------|---------|------------------------------|-------------------|------------|
| SnoR6   | Unknown | 3        | √       |                              | -                 |            |
| SnoR26  | Unknown | 1        | √       |                              | -                 |            |
| SnoR27  | Unknown | 1        | √       |                              | -                 |            |
| SnoR28  | Unknown | 5        | √       |                              | √                 |            |
| SnoR105 | Unknown |          |         |                              |                   | N,<br>CDNA |
| SnoR106 | Unknown |          |         |                              |                   | N,<br>CDNA |
| SnoR107 | Unknown |          |         |                              |                   | N,<br>CDNA |
| SnoR108 | Unknown |          |         |                              |                   | N,<br>cDNA |

### Box C/D snoRNAs with complementarity to snRNAs

| Name    | Site    | Gene No. | Cluster | D/D' box and complementarity | Plant orthologues | Expression |
|---------|---------|----------|---------|------------------------------|-------------------|------------|
| SnoR101 | U2 Cm29 |          |         | D' 12bp                      |                   | N, cDNA    |
| SnoR102 | U5 Gm41 |          |         | D 10bp                       |                   | N,<br>cDNA |

### Box C/D snoRNAs with complementarity to rRNAs

| Name                 | Site                                   | Gene No. | Cluster | D/D' box and complementarity                                                                                                     | Plant orthologues | Expression  |
|----------------------|----------------------------------------|----------|---------|----------------------------------------------------------------------------------------------------------------------------------|-------------------|-------------|
| <b>Novel snoRNAs</b> |                                        |          |         |                                                                                                                                  |                   |             |
| SnoR1                | 25S Gm2781*                            | 2        | √       | D' ATGA; 15bp, 1mm                                                                                                               | √                 | PE          |
| SnoR4                | 5.8S non-methylated site               | 2        | √       | D' CTGA                                                                                                                          | √                 | RAT         |
| SnoR7                | 25S Am1372                             | 2        | √       | D CTGA; <b>12bp</b>                                                                                                              | √                 |             |
| SnoR8                | 18S Am1575<br>18S Um1261               | 2        | √       | D' CTGA; <b>10bp</b><br>D ATGA; <b>11bp</b>                                                                                      | -                 | cDNA        |
| SnoR9                | 5.8S Am47*                             | 2        | √       | D CTGA; <b>14bp</b>                                                                                                              | -                 | N, PE, cDNA |
| SnoR10               | 25S Um2641*                            | 2        | √       | D' CTGA; <b>14bp</b>                                                                                                             | √                 | N, PE, cDNA |
| SnoR11               | 18S Am1662                             | 1        | √       | D' TTGA; 13bp, 1G:U (terminal), 1mm                                                                                              | -                 | cDNA        |
| SnoR12               | 25S Am2116*<br>25S Am943*              | 3        | √       | D' TTGA; <b>11bp, 1G:U (terminal)</b><br>D CTGA; <b>11 bp</b> (snoR12-2 and 3; 11bp, 1G:U (snoR12-1).                            | √                 | N, PE, cDNA |
| SnoR13               | 18S Um613*<br>25S Um3289               | 2        | √       | D' ATGA; <b>11bp, 1G:U (terminal)</b><br>D CTGA; <b>11bp</b> for 25S Um3289                                                      | √                 | PE          |
| SnoR14               | 18S Um1232                             | 2        | √       | D' CTGA; <b>12bp</b>                                                                                                             | √                 |             |
| SnoR15               | 18S Am438*<br>25S Cm1850*              | 1        | √       | D' CTGA; <b>13bp</b><br>D CTGA; <b>13bp</b>                                                                                      | √                 |             |
| SnoR16               | 25S Um48<br><br>25S Um2445<br>25S Um36 | 2        | √       | D CTGA; <b>12bp, 1G:U (terminal)</b> in both snoR16 variants.<br>SnoR16.1 D' CAGA; <b>12bp</b> .<br>SnoR16.2 D' CTGA; 11bp, 1mm. | √                 | PE, cDNA    |
| SnoR17               | 18S Am466*                             | 1        | √       | D' CTGA; <b>13bp</b>                                                                                                             | √                 |             |
| SnoR18               | 25S Am2924<br>18S Am162                | 2        | √       | D' TTGA; <b>12bp</b><br>D CTGA; <b>15bp, 1 G:U (terminal)</b>                                                                    | √                 | PE          |
| SnoR19               | 18S Gm1431<br>18S Um1445*              | 2        | √       | D' ATGA; <b>12bp</b><br>D CTGA; <b>12bp</b>                                                                                      | √                 | N, PE, cDNA |

|                             |                                          |    |   |                                                                                       |   |                |
|-----------------------------|------------------------------------------|----|---|---------------------------------------------------------------------------------------|---|----------------|
| <b>SnoR20</b>               | <b>18S Um1010*</b><br><b>18S ?m1011*</b> | 2  | √ | SnoR20.1 D CTGA; <b>12bp.</b><br>SnoR20.2 D CTGA <b>11bp</b>                          | √ | N, PE,<br>cDNA |
| <b>SnoR21</b>               | <b>18S Gm1272*</b>                       | 1  | √ | D' CTGA; <b>12bp</b>                                                                  | √ |                |
| <b>SnoR22</b>               | <b>25S Am1260*</b><br><b>25S Um1275*</b> | 4  | √ | D' GTGA; <b>13bp</b><br>D CTGA; <b>11bp</b>                                           | √ | PE             |
| <b>SnoR23</b>               | <b>18S Am1754*</b>                       | 3  | √ | D CTGA; <b>15bp</b>                                                                   | √ | PE             |
| <b>SnoR24</b><br>(intronic) | <b>25S Cm2826*</b>                       | 4  | √ | D CTGA; <b>10bp</b>                                                                   | √ | PE             |
| <b>SnoR25</b>               | <b>18S Cm795</b>                         | 1  | √ | D' TTGA; <b>14bp</b>                                                                  | - |                |
| <b>SnoR29</b>               | <b>25S Gm2404*</b>                       | 2  | √ | D' CAGA; <b>10bp.</b>                                                                 | √ | PE, cDNA       |
| <b>SnoR30</b>               | <b>18S Gm390*</b>                        | 1  | √ | D' CTGA; <b>10bp, 1G:U terminal.</b>                                                  | √ | PE, cDNA       |
| <b>SnoR31</b>               | <b>25S Am2901</b>                        | 1  | √ | D CTGA; <b>16bp, 1 G:U (terminal).</b>                                                | √ | PE, cDNA       |
| <b>SnoR32</b>               | <b>18S Am1327</b><br><b>18S Um1263*</b>  | 2  | √ | D' CGTA <b>13bp</b><br>D CTGA; <b>14bp, 2G:Us (1 terminal)</b>                        | √ | N, PE,<br>cDNA |
| <b>SnoR33</b>               | <b>18S Am1861*</b>                       | 1  |   | D' CTGA; <b>13bp, 2 G:Us (both terminal)</b>                                          | - |                |
| <b>SnoR34</b>               | <b>25S Gm2907</b><br><b>18S Um1270*</b>  | 1  |   | D' CTGA; <b>12bp.</b><br>D CTGA; <b>13bp, 2G:Us (1 terminal)</b>                      | - |                |
| <b>SnoR35</b>               | <b>25S Cm2610</b><br><b>18S Um1104</b>   | 1  |   | D' CTGA; <b>10bp</b><br>D CTGA; <b>13bp, 1mm</b>                                      | - |                |
| <b>SnoR36</b>               | <b>25S Um145</b><br><b>25S Um1218</b>    | 1  | √ | D CTGA; <b>13bp, 1G:U (terminal)</b><br>D' CAGA; <b>13 bp, 2G:Us (terminal), 1 mm</b> | √ | PE, cDNA       |
| <b>SnoR37</b>               | <b>25S Cm2355*</b><br><b>25S Um2411</b>  | 3  | √ | D CTGA; <b>11bp</b> for 25S<br>D' CAGA; <b>12bp, 2 G:Us (terminal)</b>                | √ | PE, cDNA       |
| <b>SnoR38</b>               | <b>18S Um1158</b>                        | 1  |   | D CTGA; <b>10bp, 1mm or 15bp, 2G:U, 1mm.</b>                                          | - | PE             |
| <b>SnoR39</b>               | <b>18S Gm668</b>                         | 3? |   | D CTGA; <b>17 bp, 3 G:Us, 1mm</b>                                                     | - | PE             |
| <b>SnoR40</b><br>(intronic) | <b>25S Um2483</b>                        | 2  | √ | D' CTGA; <b>16 bp, 1 G:U or 13bp.</b>                                                 | - | PE             |
| <b>SnoR41</b>               | <b>25S Gm2829</b>                        | 2  |   | D CTGA; <b>15bp, 2G:Us, 2mm</b>                                                       | √ | PE             |
| <b>SnoR42</b>               | <b>18S Um305</b>                         | 1  |   | D CTGA; <b>12 bp</b>                                                                  | - | PE             |
| <b>SnoR43</b>               | <b>18S Am543*</b>                        | 3  |   | D' CTGA; <b>14 bp, 1 G:U, 1mm</b>                                                     | - | PE, cDNA       |
| <b>SnoR44</b>               | <b>25S Cm2327*</b><br><b>25S Am2316*</b> | 3  | √ | D' CAGA; <b>11bp</b><br>D CTGA; <b>10bp</b>                                           | √ | cDNA           |
| <b>SnoR45</b>               | <b>25S Gm207</b>                         | 1  |   | D CTGA; <b>14bp. 2G:Us, 3 nt from D box.</b>                                          | - | PE             |

|                      |                           |            |   |                                                                   |   |                |
|----------------------|---------------------------|------------|---|-------------------------------------------------------------------|---|----------------|
| SnoR46               | 18S Cm1174                | 1          |   | D CTGA; 13bp, 1G:U, 1mm.                                          | - | PE             |
| SnoR47               | 25S Gm1079<br>25S Cm1989  | 1          |   | D' CTGA; 16bp, 3G:U, 1mm.<br>D CTGA; 11bp, 3G:Us, 1mm.            |   | PE, cDNA       |
| SnoR48               | 18S Gm1596                | 1          |   | D CTGA; 14bp, 1G:U, 1mm.                                          | - | PE             |
| SnoR49               | 25S Um2863                | 1          |   | D' TTGA; 12bp, 1G:U, 1mm..                                        |   | PE             |
| SnoR50               | 25S Gm1717                | 1          |   | D' TCGA 16bp, 1G:U, 1mm.                                          | - | PE             |
| SnoR51               | 25S Gm2942*               | 1          |   | D CTGA; 10bp, 1mm                                                 | - | PE             |
| SnoR52               | 25S Gm2885                | 1          |   | D CTGA; <b>12bp, 1G:U</b>                                         | - | PE             |
| SnoR53               | 25S Um2400*               | 1          |   | D' CTCA <b>12 bp</b>                                              | - | PE             |
| SnoR54               | 18S Am1558                | 1          |   | D' TTGA; <b>11bp, 2G:Us (1 terminal)</b>                          | - | PE             |
| SnoR55               | 25S Am 184                | 1          |   | D' CTGA 16bp, 1G:U, 2mm                                           | - | PE             |
| SnoR56               | 25S Gm1583                | 1          |   | D CTGA; <b>11bp, 1G:U</b>                                         | - | PE             |
| SnoR57               | 25S Gm849                 | 1          |   | D' CTGA; 14bp, 1G:U (terminal), 1mm.                              | - | PE, cDNA       |
| SnoR58<br>(intronic) | 18S Gm391*                | 1          |   | D' TGGGA <b>10bp.</b>                                             | - | PE, cDNA       |
| snoR59               | 18S Am975*<br>25S Gm1845* | 2          | √ | D' CCGA (59a) and CTGA (59b); <b>13bp</b><br>D CTGA; <b>11bp.</b> | √ | cDNA           |
| SnoR60               | 25S Gm2114*               | 2          |   | D' CAGA; <b>13bp, 1G:U</b>                                        | √ | RAT,<br>cDNA   |
| SnoR61               | 25S Am1248                | 5 or<br>3? |   | D CTGA; <b>11bp, 1G:U (terminal)</b>                              | - | PE             |
| SnoR62               | 26S Cm2275                | 1          |   | D TTGA; 13bp, 1G:U, 1mm.                                          |   | PE             |
| SnoR63               | 25S Cm1840*               | 1          |   | D' CTGT; <b>13bp.</b>                                             |   | N, PE,<br>cDNA |
| SnoR64               | 18S Am1527<br>25S Um2873  |            |   | D' <b>12bp</b><br>D 11bp, 1mm                                     |   | N, cDNA        |
| SnoR65               | 25S Gm398                 |            |   | D <b>12bp</b>                                                     |   | N,<br>cDNA     |
| SnoR66               | 18S Cm38                  |            |   | D' <b>12bp</b>                                                    |   | N,<br>cDNA     |
| SnoR67               | 18S Um1261                |            |   | D <b>12bp</b>                                                     |   | N,<br>cDNA     |
| SnoR68               | 25S Um2726                |            |   | D <b>12bp</b>                                                     |   | N,<br>cDNA     |
| SnoR69               | 18S Gm1415                | 1          |   | D' TTGA; 12bp, 1G:U, 2mm or 10bp, 1G:U,<br>1mm.                   | - | PE             |

|                                                         |                                          |   |   |                                                                                    |   |                |
|---------------------------------------------------------|------------------------------------------|---|---|------------------------------------------------------------------------------------|---|----------------|
| <b>SnoR70</b>                                           | <b>25S Um784*</b>                        | 1 |   | D' TTGA; 15bp, 3G:Us, 1mm.                                                         | - | PE             |
| <b>SnoR71</b>                                           | <b>25S Gm2831</b>                        | 2 |   | D' GGA, <b>10bp</b>                                                                | - | PE             |
| <b>SnoRNAs with yeast orthologues</b>                   |                                          |   |   |                                                                                    |   |                |
| <b>SnoR38Y</b>                                          | <b>25S Gm2805</b>                        | 2 | √ | SnoR38Y.2 D' CTGA; <b>13bp.</b>                                                    | - |                |
| <b>SnoR39BY</b>                                         | <b>25S Gm812*</b><br><b>5.8S Gm79*</b>   | 2 | √ | D' CTGA; <b>14bp.</b><br>D CTGA; <b>10bp</b>                                       | √ | N, PE,<br>cDNA |
| <b>SnoR41Y</b>                                          | <b>18S Am543*</b><br><b>25S Um1064</b>   | 1 | √ | D CTGA; <b>12bp.</b><br>D' ATGA; <b>10bp</b>                                       | - | PE, cDNA       |
| <b>SnoR53Y</b>                                          | <b>18S Am799*</b>                        | 1 | √ | D' CTGA; <b>10bp</b>                                                               | - | cDNA           |
| <b>SnoR58Y</b>                                          | <b>25S Cm674</b>                         | 2 | √ | D' CAGA; <b>14bp, 1G:U (terminal).</b>                                             | - | PE             |
| <b>SnoR68Y</b>                                          | <b>25S Am2631*</b>                       | 1 | √ | D' CTTA (poor); 13bp, 1mm                                                          | - |                |
| <b>SnoR69Y</b>                                          | <b>25S Cm2938</b>                        | 1 | √ | D' ATGA; 12bp, 1mm (at modified base)                                              | - |                |
| <b>SnoR72Y</b>                                          | <b>25S Am883</b>                         | 4 | √ | D CTGA; <b>14bp</b>                                                                | √ |                |
| <b>SnoR77Y</b>                                          | <b>18S Um580</b>                         | 2 | √ | D' CTGA; <b>11bp</b>                                                               | √ | cDNA           |
| <b>SnoRNAs with human (and human/yeast) orthologues</b> |                                          |   |   |                                                                                    |   |                |
| <b>U14</b>                                              | <b>18S Cm416</b>                         | 4 | √ | D' CTGA; <b>14bp.</b>                                                              | √ | N, PE,<br>cDNA |
| <b>U15</b>                                              | <b>25S Gm2278*</b><br><b>25S Am2271*</b> | 3 | √ | D' CCGA; <b>11bp</b> (U15.1a and b); <b>10 bp</b> (U15.2)<br>D CTGA; <b>12 bp.</b> | √ | PE, cDNA       |
| <b>U16</b>                                              | <b>18S Am438*</b>                        | 1 | √ | D' CTGA; <b>14bp, 1G:U (terminal)</b>                                              | - | N, PE,<br>cDNA |
| <b>U18</b>                                              | <b>25S Am660</b>                         | 2 | √ | D' CTGA (U18-1), CAGA (U18-2); <b>13bp.</b>                                        | √ | PE, cDNA       |
| <b>U24</b>                                              | <b>25S Am1451*</b><br><b>25S Cm1439*</b> | 2 | √ | D' TTGA; <b>13bp</b><br>D CTGA; <b>14bp.</b>                                       | - |                |
| <b>U27</b>                                              | <b>18S Am27</b>                          | 2 | √ | D CTGA ; <b>13bp.</b>                                                              | √ | cDNA           |
| <b>U29</b>                                              | <b>25S Am2936</b>                        | 1 | √ | D' ATGA; 12bp, 1G:U, 1mm at modified base                                          | √ |                |
| <b>U30</b>                                              | <b>25S Am2311*</b>                       | 1 |   | D' CTGA; <b>12bp</b>                                                               | - | cDNA           |
| <b>U31</b>                                              | <b>25S Gm2610*</b>                       | 2 | √ | D' CTTA; <b>11bp, 1G:U</b>                                                         | √ | RAT,<br>cDNA   |
| <b>U33</b>                                              | <b>18S Gm1270</b>                        | 2 | √ | D CTGA; <b>13bp, 2 G:Us (1 terminal)</b>                                           | √ | RAT            |

|                                                            |                            |         |   |                                                                                           |   |          |
|------------------------------------------------------------|----------------------------|---------|---|-------------------------------------------------------------------------------------------|---|----------|
| U34                                                        | 25S Um1882*                | 3 or 4? | √ | D' TTGA; <b>13bp, 1G:U</b> (U34a), 13bp, 1mm (U34c)                                       | √ | PE       |
| U35                                                        | 25S Cm2949*                | 1       |   | D' CTGA; <b>13bp</b>                                                                      | √ |          |
| U36                                                        | 18S Am621                  | 1       | √ | D CTGA; <b>12bp</b>                                                                       | √ |          |
| U36a                                                       | 25S Gm2226<br>25S Am2210*  | 3       | √ | D' CTGA; <b>12 bp</b> (U36a-1 and -2); <b>11bp, 1 G:U</b> (U36a-3)<br>D ATGA; <b>16bp</b> | √ |          |
| U37                                                        | 25S Am2204*                | 1       |   | D' CCGA; <b>15bp or 16 bp, 1G:U terminal</b>                                              | - | PE       |
| U38                                                        | 25S Am1140                 | 3       | √ | D' CAGA; <b>12 bp.</b> (U38-1 and -3); <b>13bp</b> (U38-2)                                | √ | PE, cDNA |
| U43                                                        | 18S Cm1641                 | 2       | √ | D' CTGA; <b>10bp</b>                                                                      |   | PE, cDNA |
| U49                                                        | 25S Cm2869*<br>25S Cm1510* | 3       | √ | D' ATGA; <b>14bp, 1mm</b> (mismatch conserved in human)                                   | √ | PE       |
| U51                                                        | 25S Am814*                 | 2       | √ | D CTGA; <b>14bp</b>                                                                       | √ | RAT      |
| U53                                                        | 25S Um2355                 | 1       |   | D' CTGA; 16 bp, 1 G:U and 1mm                                                             | - |          |
| U54                                                        | 18S Gm597                  | 1       | √ | D' CTGA; <b>13bp</b>                                                                      | - |          |
| U55                                                        | 25S Gm1850*                | 1       | √ | D CTGA; <b>13bp</b>                                                                       | - |          |
| U56                                                        | 18S Cm471*                 | 1       |   | D' CTGT; <b>13bp</b>                                                                      | - |          |
| U61                                                        | 18S Um1381                 | 1       | √ | D CTGA; <b>14bp</b>                                                                       | √ |          |
| U80                                                        | 25S Am824<br>25S Gm915     | 2       | √ | D' ATGA; <b>10bp.</b><br>D CTGA; <b>17 bp, 1G:U</b> (U80.1); <b>16 bp, 1 G:U</b> (U80.2)  | √ | PE       |
| <b>Mapped modification sites with no snoRNA determines</b> |                            |         |   |                                                                                           |   |          |
|                                                            | 25S Um1634*                |         |   |                                                                                           |   |          |
|                                                            | 25S Um1918*                |         |   |                                                                                           |   |          |
|                                                            | 25S Cm2642*                |         |   | Human U58                                                                                 |   |          |
|                                                            | 25S Gm 2783*               |         |   | Human U60/yeast snR48                                                                     |   |          |
|                                                            | 25S Cm2847*                |         |   |                                                                                           |   |          |
|                                                            | 25S Cm2856*                |         |   | Human - methylated but snoRNA not determined                                              |   |          |
|                                                            | 25S Um2943*                |         |   | Human - methylated but snoRNA not determined                                              |   |          |
