# Supplementary material
Source: PubMed Central journal article supplement (PMC165456)
Supplement: nar_31_1_432__3.pdf [file nar_31_1_432__3.pdf]

## *Arabidopsis* rRNA modification sites and conservation with human and yeast

| SnoRNA                 | Predicted Sites | Mapped Sites | Human SnoRNA | Human sites | Yeast SnoRNA | Yeast Sites | Conservation of sites |
|------------------------|-----------------|--------------|--------------|-------------|--------------|-------------|-----------------------|
| <b>5.8S</b>            |                 |              |              |             |              |             |                       |
| AtsnoR9                | Am47            | 1,2          | -            | -           | -            | -           | P                     |
| AtsnoR85               | Ψ78             |              |              |             |              |             | P                     |
| AtsnoR39BY             | Gm79            | 1,2          | Nd           | Gm75        | -            | -           | PH                    |
| <b>18S</b>             |                 |              |              |             |              |             |                       |
| AtU27                  | Am28            |              | U27          | Am27        | SnR74        | Am28        | PHY                   |
| AtsnoR66               | Cm38            |              | -            | -           | -            | -           | P                     |
| AtsnoR100              | Ψ111            |              | Nd           | Ψ110        |              |             | PH                    |
| AtsnoR18               | Am162           |              | U44          | Am166       | -            | -           | PH                    |
| AtsnoR89               | Ψ220            |              | -            | -           | -            | -           | P                     |
| AtsnoR42               | Um305           |              | -            | -           | -            | -           | P                     |
| AtsnoR86               | Ψ360            |              | -            | -           | -            | -           | P                     |
| AtsnoR30               | Gm390           | 1,2          | Nd           | Gm436       | -            | -           | PH                    |
| AtsnoR58               | Gm391           | 1            | Nd           | Gm436       | -            | -           | PH                    |
| AtU14                  | Cm416           |              | U14          | Cm462       | U14          | Cm414       | PHY                   |
| AtsnoR15/<br>AtU16     | Am438           | 1,2          | U16          | Am484       | -            | -           | PH                    |
| AtsnoR17               | Am466           | 2            | Nd           | Am512       | -            | -           | PH                    |
| AtU56                  | Cm471           | 2            | U56          | Cm517       | -            | -           | PH                    |
| AtsnoR43/<br>AtsnoR41Y | Am543           | 1            | Nd           | Am590       | SnR41        | Am541       | PHY                   |
| AtsnoR77Y              | Um580           |              | Nd           | Um627       | SnR77        | Um578       | PHY                   |
| AtU54                  | Gm597           |              | U54          | Gm644       | -            | -           | PH                    |
| AtsnoR91               | Ψ604            |              | -            | -           | -            | -           | P                     |
| AtsnoR13               | Um613           |              | -            | -           | -            | -           | P                     |
| AtU36                  | Am621           |              | U36a         | Am668       | SnR47        | Am619       | PHY                   |
| AtsnoR73               | Ψ634            |              | Nd           | Ψ681        | -            | -           | PH                    |
| AtsnoR39               | Gm668           |              | -            | -           | -            | -           | P                     |
| AtsnoR87               | Ψ715            |              | -            | -           | -            | -           | P                     |
| AtsnoR77               | Ψ752            |              | -            | -           | -            | -           | P                     |
| AtsnoR91               | Ψ761            |              | Nd           | Ψ815        | -            | -           | PH                    |
| AtsnoR25               | Cm795           |              | -            | -           | -            | -           | P                     |
| AtsnoR53Y              | Am799           | 2            | -            | -           | SnR53        | Am796       | PY                    |

|                      |        |     |     |        |       |        |     |
|----------------------|--------|-----|-----|--------|-------|--------|-----|
| AtsnoR99             | Ψ803   |     |     |        |       |        | P   |
| AtsnoR84             | Ψ827   |     |     |        |       |        | P   |
| AtsnoR76             | Ψ918   |     |     |        |       |        | P   |
| AtsnoR90             | Ψ948   |     | Nd  | Ψ1004  |       |        | PH  |
| AtsnoR59             | Am975  | 2   | U59 | Am1031 | SnR54 | Am975  | PHY |
| AtsnoR5/<br>AtsnoR72 | Ψ1000  |     | Nd  | Ψ1056  | SnR31 | Ψ998   | PHY |
| AtsnoR20.1           | Um1010 | 1,3 | -   | -      | -     | -      | P   |
| AtsnoR20.2           | Cm1011 | 3   | -   | -      | -     | -      | P   |
| AtsnoR91             | Ψ1090  |     |     |        |       |        | P   |
| AtsnoR35             | Um1104 |     | -   | -      | -     | -      | P   |
| AtsnoR5/<br>AtsnoR72 | Ψ1118  |     | -   | -      | -     | -      | P   |
| AtsnoR38             | Um1158 |     | -   | -      | -     | -      | P   |
| AtsnoR46             | Cm1174 |     | -   | -      | -     | -      | P   |
| AtsnoR14             | Um1232 |     | Nd  | Um1288 | -     | -      | PH  |
| AtsnoR8/<br>AtsnoR67 | Um1261 |     | -   | -      | -     | -      | P   |
| AtsnoR32             | Um1263 | 3   | -   | -      | -     | -      | P   |
| AtsnoR34/<br>U33     | Um1270 | 2   | U33 | Um1326 | SnR55 | Um1267 | PHY |
| AtsnoR21             | Gm1272 | 2   | U32 | Gm1328 | SnR40 | Gm1269 | PHY |
| AtsnoR88             | Ψ1302  |     | -   | -      | -     | -      | P   |
| AtsnoR32             | Am1327 |     | Nd  | Am1383 | -     | -      | PH  |
| AtU61                | Um1381 |     | U61 | Um1442 | -     | -      | PH  |
| AtsnoR69             | Gm1415 |     | -   | -      | -     | -      | P   |
| AtsnoR19             | Gm1431 |     | U25 | Gm1490 | SnR56 | Gm1427 | PHY |
| AtsnoR19             | Um1445 | 1   | -   | -      | -     | -      | P   |
| AtsnoR73             | Ψ1520  |     | -   | -      | -     | -      | P   |
| AtsnoR78             | Ψ1523  |     | -   | -      | -     | -      | P   |
| AtsnoR64             | Am1527 |     | -   | -      | -     | -      | P   |
| AtsnoR54             | Am1558 |     | -   | -      | -     | -      | P   |
| AtsnoR8              | Am1575 |     | -   | -      | -     | -      | P   |
| AtsnoR48             | Gm1596 |     | -   | -      | -     | -      | P   |
| AtU43                | Cm1641 |     | U43 | Cm1705 | SnR70 | Cm1638 | PHY |
| AtsnoR11             | Am1662 |     | -   | -      | -     | -      | P   |
| AtsnoR23             | Am1754 | 1   | Nd  | Am1850 | Nd    | Am1779 | PHY |
| <b>25S</b>           |        |     |     |        |       |        |     |
| AtsnoR89             | Ψ35    |     | -   | -      | -     | -      | P   |
| AtsnoR16.2           | Um36   |     | -   | -      | -     | -      | P   |
| AtsnoR16             | Um48   |     | -   | -      | -     | -      | P   |
| AtsnoR94             | Ψ132   |     | -   | -      | -     | -      | P   |
| AtsnoR36             | Um145  |     | -   | -      | -     | -      | P   |
| AtsnoR55             | Am184  |     | -   | -      | -     | -      | P   |
| AtsnoR45             | Gm207  |     | -   | -      | -     | -      | P   |
| AtsnoR76             | Ψ214   |     | -   | -      | -     | -      | P   |
| AtsnoR65             | Gm398  |     | -   | -      | -     | -      | P   |

|                       |        |     |          |        |          |        |     |
|-----------------------|--------|-----|----------|--------|----------|--------|-----|
| AtU18                 | Am660  |     | U18      | Am1313 | U18      | Am647  | PHY |
| AtsnoR58Y             | Cm674  |     | Nd       | Cm1327 | SnR58    | Cm661  | PHY |
| AtsnoR82              | Ψ783   |     | -        | -      | -        | -      | P   |
| AtsnoR70              | Um784  | 1   | -        | -      | -        | -      | P   |
| AtsnoR39BY            | Gm812  | 1,2 | Nd       | Gm1509 | SnR39B   | Gm803  | PHY |
| AtU51                 | Am814  | 2   | U51/U32a | Am1511 | SnR39/59 | Am805  | PHY |
| AtU80                 | Am824  |     | U80/U77  | Am1521 | SnR60    | Am815  | PHY |
| AtsnoR77              | Ψ826   |     | Nd       | Ψ1523  |          |        | PH  |
| AtsnoR57              | Gm849  |     | -        | -      | -        | -      | P   |
| AtsnoR72Y             | Am883  |     | -        | -      | SnR72    | Am874  | PY  |
| AtU80                 | Um915  |     | U80      | Gm1612 | SnR60    | Gm906  | PHY |
| AtsnoR80              | Ψ999   |     | nd       | Ψ1717  | SnR49    | Ψ990   | PHY |
| AtsnoR81/<br>AtsnoR98 | Ψ1013  |     | Nd       | Ψ1731  | SnR5     | Ψ1004  | PHY |
| AtsnoR41Y             | Um1064 |     | -        | -      | -        | -      | P   |
| AtsnoR47              | Gm1079 |     | -        | -      | -        | -      | P   |
| AtsnoR80              | Ψ1130  |     | nd       | Ψ1909  | SnR5     | Ψ1124  | PHY |
| AtU38                 | Am1140 |     | U38ab    | Am1858 | SnR61    | Am1131 | PHY |
| AtsnoR36              | Um1218 |     | -        | -      | -        | -      | P   |
| AtsnoR96              | Ψ1246  |     | -        | -      | -        | -      | P   |
| AtsnoR61              | Am1248 |     | -        | -      | -        | -      | P   |
| AtsnoR22              | Am1260 | 1   | -        | -      | -        | -      | P   |
| AtsnoR22              | Um1275 | 1   | -        | -      | -        | -      | P   |
| AtU24                 | Cm1439 | 2   | U24      | Cm2338 | U24      | Cm1435 | PHY |
| AtU24                 | Am1451 | 2   | U76      | Am2350 | U24      | Am1447 | PHY |
| AtU49                 | Cm1510 | 2   | U49      | Cm2409 | -        | -      | PH  |
| AtsnoR56              | Gm1583 |     | -        | -      | -        | -      | P   |
| AtsnoR50              | Gm1717 |     | -        | -      | -        | -      | P   |
| AtsnoR63              | Cm1840 |     | -        | -      | -        | -      | P   |
| AtsnoR59              | Gm1845 | 2   | -        | -      | -        | -      | P   |
| AtsnoR15              | Cm1850 | 2   | U55/U39  | Cm2791 | -        | -      | PH  |
| AtU55                 |        |     |          |        |          |        |     |
| AtsnoR33              | Am1861 | 2   | Nd       | Am2802 | -        | -      | PH  |
| AtU34                 | Um1882 | 1,2 | U34      | Um2824 | SnR62    | Um1886 | PHY |
| AtsnoR47              | Gm1989 |     | -        | -      | -        | -      | P   |
| AtsnoR60              | Gm2114 | 1,4 | -        | -      | -        | -      | P   |
| AtsnoR12              | Am2116 | 3,4 | -        | -      | -        | -      | P   |
| AtsnoR87              | Ψ2126  |     | Nd       | Ψ3618  |          |        | PH  |
| AtsnoR99              | Ψ2201  |     | Nd       | Ψ3694  |          |        | PH  |
| AtU37                 | Am2204 | 2   | U37      | Am3697 | -        | -      | PH  |
| AtU36a                | Am2210 | 2   | U36      | Am3703 | SnR47    | Am2218 | PHY |
| AtU36a                | Gm2226 |     | -        | -      | -        | -      | P   |
| AtsnoR92              | Ψ2244  |     | Nd       | Ψ3737  | -        | -      | PH  |
| AtsnoR79              | Ψ2248  |     | Nd       | Ψ3741  | -        | -      | PH  |
| AtU19                 | Ψ2250  |     | Nd       | Ψ3743  |          |        | PH  |
| AtU15                 | Am2271 | 1,2 | U15      | Am3764 | SnR13    | Am2279 | PHY |
| AtsnoR62              | Cm2275 |     | -        | -      | -        | -      | P   |
| AtU15                 | Gm2278 | 2   | -        | -      | SnR75    | Gm2286 | PY  |
| AtsnoR83              | Ψ2304  |     | Nd       | Ψ3797  |          |        | PH  |
| AtU30                 | Am2311 | 2   | U30      | Am3804 | -        | -      | PH  |

|                       |        |       |     |        |       |        |     |
|-----------------------|--------|-------|-----|--------|-------|--------|-----|
| AtsnoR44              | Am2316 | 1,2   | U79 | Am3809 | -     | -      | PH  |
| AtsnoR44              | Cm2327 | 1     | U74 | Cm3820 | SnR64 | Cm2235 | PHY |
| AtsnoR83              | Ψ2339  |       | Nd  | Ψ3832  |       |        | PH  |
| AtsnoR37/<br>AtU53    | Cm2355 | 1     | U53 | Am3848 | -     | -      | PH  |
| AtsnoR29              | Gm2381 |       | -   | -      | -     | -      | P   |
| AtsnoR53              | Um2400 | 1     | -   | -      | -     | -      | P   |
| AtsnoR24              | Cm2404 | 1,2   | -   | -      | -     | -      | P   |
| AtsnoR37              | Um2411 |       | U52 | Um3904 | SnR78 | Um2414 | PHY |
| AtsnoR16.1            | Um2445 |       | -   | -      | -     | -      | P   |
| AtsnoR40              | Um2483 |       | -   | -      | -     | -      | P   |
| AtsnoR86              | Ψ2555  |       | -   | -      | -     | -      | P   |
| AtsnoR35/<br>AtU31    | Gm2610 | 2     | U31 | Gm4166 | SnR67 | Gm2616 | PHY |
| AtsnoR78              | Ψ2620  |       | -   | -      | -     | -      | P   |
| AtsnoR68Y             | Am2631 | 2     | -   | -      | SnR68 | Am2637 | PY  |
| AtsnoR10              | Um2641 | 2     | Nd  | Um4197 | -     | -      | PH  |
| AtsnoR95              | Ψ2703  |       | -   | -      | -     | -      | P   |
| AtsnoR97              | Ψ2707  |       | Nd  | Ψ4263  |       |        | PH  |
| AtsnoR68              | Um2726 |       | -   | -      | -     | -      | P   |
| AtsnoR93              | Ψ2773  |       | Nd  | Ψ4330  |       |        | PH  |
| AtsnoR1               | Gm2781 | 1,2,4 | -   | -      | SnR48 | Gm2788 | PY  |
| AtsnoR38Y             | Gm2805 |       | -   | -      | SnR38 | Gm2812 | PY  |
| AtU65                 | Ψ2816  |       | U65 | Ψ4373  | SnR34 | Ψ2823  | PHY |
| AtsnoR24              | Cm2826 |       | -   | -      | -     | -      | P   |
| AtsnoR71              | Gm2831 |       | -   | -      | -     | -      | P   |
| AtsnoR41              | Gm2829 |       | -   | -      | -     | -      | P   |
| AtsnoR49              | Um2863 |       | -   | -      | -     | -      | P   |
| AtU49                 | Cm2869 | 1,2   | U49 | Cm4426 | -     | -      | PH  |
| AtU65                 | Ψ2870  |       | U65 | Ψ4427  | SnR34 | Ψ2877  | PHY |
| AtsnoR64              | Um2873 |       | -   | -      | -     | -      | P   |
| AtsnoR52              | Gm2885 |       | -   | -      | -     | -      | P   |
| AtsnoR31              | Am2901 |       | -   | -      | -     | -      | P   |
| AtsnoR34              | Gm2907 |       | Nd  | Gm4464 | -     | -      | PH  |
| AtsnoR74/<br>AtsnoR75 | Ψ2913  |       | Nd  | Ψ4470  | Nd    | Ψ2920  | PHY |
| AtsnoR18              | Am2924 |       | -   | -      | -     | -      | P   |
| AtU29                 | Am2936 |       | U29 | Am4493 | SnR71 | Am2943 | PHY |
| AtsnoR69Y             | Cm2938 |       | -   | -      | SnR69 | Cm2945 | PY  |
| AtsnoR51              | Gm2942 |       | -   | -      | -     | -      | P   |
| AtU35                 | Cm2949 | 2     | U35 | Cm4506 | SnR73 | Cm2956 | PHY |
| AtsnoR13              | Um3289 |       | -   | -      | -     | -      | P   |

Mapped sites with unknown snoRNA

|    |        |        |    |        |     |        |     |
|----|--------|--------|----|--------|-----|--------|-----|
| Nd | Gm1452 | 2      | Nd | Gm2351 | U24 | Gm1448 | PHY |
| Nd |        | Um1634 | -  | -      | -   | -      | P   |
| Nd |        | Um1918 | -  | -      | -   | -      | P   |

|    |        |     |        |       |        |     |
|----|--------|-----|--------|-------|--------|-----|
| Nd | Gm2642 | U58 | Gm4198 | -     | -      | PH  |
| Nd | Gm2783 | U60 | Gm4340 | SnR48 | Gm2790 | PHY |
| Nd | Cm2847 | -   | -      | -     | -      | P   |
| Nd | Cm2856 | Nd  | Cm4413 | -     | -      | PH  |
| Nd | Um2943 | Nd  | Um4500 | -     | -      | PH  |

Nd - methylation site but no snoRNA identified; "-" - no human/yeast site and no known human/yeast snoRNA. Numbering of *Arabidopsis*, human and yeast rRNAs are based on Genbank Accessions: X16077 and X52320, U13369 (see Kiss-László et al. 1996) and the snoRNA database for *S. cerevisiae* methyl guide snoRNAs (<http://fisher.wustl.edu/eddy/snoRNAdb/SC/Sc-snos-bysno.html>). P – plant, H – Human, Y – yeast.

References for mapped sites:

1. Barneche et al. (2001)
2. Brown et al. (2001)
3. Qu et al. (2001)
4. Barneche et al. (200)
